1 **Disentangling the historical routes to community assembly in the global**  
2 **epicentre of biodiversity**

3 Bouwe R. Reijenga<sup>1\*</sup>, Benjamin G. Freeman<sup>2</sup>, David J. Murrell<sup>1</sup>, and Alex L. Pigot<sup>1</sup>

4 <sup>1</sup> Centre for Biodiversity and Environment Research, Department of Genetics, Evolution and  
5 Environment, University College London, London, UK

6 <sup>2</sup> Beatty Biodiversity Centre, University of British Columbia, Vancouver, British Columbia,  
7 Canada

8 **Abstract**

9 Understanding the processes through which ecological communities are assembled remains  
10 a major challenge, particularly in hotspots of biodiversity such as tropical mountains. Here,  
11 we apply continuous-time Markov models to elevational, geographical and phylogenetic data  
12 for 166 avian sister pairs to infer the relative frequency of different historical pathways  
13 involved in the build-up of species on Neotropical mountains, the Earth's most biodiverse  
14 terrestrial region. We show that sister species arising in geographic isolation but now  
15 sympatric (i.e. living on the same mountain slope), have assembled through a mix of different  
16 routes. Ecological sorting whereby species diverge to different elevations in allopatry occurs  
17 with a similar frequency to ecological displacement where divergence in elevation occurs  
18 upon secondary contact. However, both these routes are far less common than ecological  
19 niche conservatism, whereby species transition to sympatry without diverging in their  
20 elevation range. Our results suggest the predominance of this more direct and thus faster  
21 route to sympatry may help explain the exceptional species richness of tropical mountains.

22 **Keywords:** biotic interactions, elevational range, character displacement, sympatry, species  
23 sorting, community assembly

24 **Author for correspondence:** Bouwe R. Reijenga, email: [bouwe.reijenga.18@ucl.ac.uk](mailto:bouwe.reijenga.18@ucl.ac.uk)

## 25 **1. Introduction**

26 Explaining the combination and diversity of species that co-occur within communities  
27 remains a major challenge in ecology. This is in part because the patterns of spatial overlap  
28 observed at the present depend not only on current ecological interactions between species,  
29 but also on historical processes that play out over much longer time-frames and that are  
30 beyond the reach of direct observation or experimental manipulation [1,2]. These historical  
31 processes include speciation, niche evolution, dispersal, and range expansions [3–5], with  
32 differences in the dynamics of these processes and the ecological factors controlling them,  
33 underlying different theoretical models for how communities are assembled.

34 One of the main models for how communities assemble is based on the idea that new  
35 species arising in spatial isolation (i.e. allopatry) diverge in their ecological niche, and only  
36 those that happen to diverge sufficiently to minimise competition are able to co-occur when  
37 they come back into secondary contact [6,7]. According to this model, community assembly  
38 largely involves the ‘ecological sorting’ of pre-existing variation arising due to geographically  
39 variable selection pressures. An alternative to the ecological sorting model, proposes that  
40 niche differences between co-occurring species arise upon secondary contact, with  
41 competition between species driving divergent selection and a displacement of their  
42 ecological niches [8]. As with ‘ecological sorting’, this ‘ecological displacement’ (termed  
43 ‘character displacement’ when considering heritable traits) model assumes that niche  
44 similarity limits co-occurrence, but differs in its predictions of when and why niche differences  
45 evolve. A final possibility, is that species may re-assemble into communities whilst retaining  
46 their ancestral niche. This ‘niche conservatism’ model [9] is expected to predominate if  
47 ecological niche overlap is not limiting, either because of other constraints on co-occurrence  
48 (e.g. dispersal limitation) or because species have diverged along alternative niche  
49 dimensions [10].

50 A classic system for studying these historical processes concerns the distribution of  
51 vertebrates on mountains in the tropics. Tropical mountains are renowned for their  
52 exceptional diversity. For instance, in the tropical Andes over 1000 species of birds can be  
53 found living on a single mountain slope [11]. Since most speciation events involve the  
54 geographic isolation of populations on different mountains (i.e. allopatry) [12–14], the main  
55 problem is to understand how these species subsequently assemble on the same mountain  
56 slope (i.e. sympatry) and partition ecological niche space. In this case, sympatry may involve  
57 species co-occurring at the same elevation. However, elevation can also be regarded as a  
58 key niche axis along which species can diverge and thus coexist at the scale of the entire  
59 mountain slope. Indeed, many species have very narrow elevation distributions (e.g. a few

60 hundred metres in vertical distance) and replace one another across the gradient [15,16].  
61 Previous studies have variously provided evidence that niche conservatism, ecological  
62 sorting and displacement may all be involved in shaping these patterns of co-occurrence and  
63 turnover along mountain slopes, but progress in disentangling their relative contributions has  
64 been limited.

65 One problem is that different assembly models can lead to same present day pattern. In  
66 particular, according to the niche conservatism model, species living on the same mountain  
67 slope have overlapping elevation ranges because they retain the adaptations to specific  
68 environmental conditions inherited from their ancestor [9]. However, while some studies have  
69 argued that niche conservatism is a pervasive process [17], the same pattern could also  
70 arise under the ecological displacement model. In this case, competition on secondary  
71 contact first forces species to occupy different elevations, but as species diverge along  
72 alternative niches dimensions (e.g. resource or microhabitat use) they subsequently expand  
73 their elevation ranges and overlap along the gradient. This ecological displacement model  
74 has also been proposed to be the dominant process explaining the build-up of co-occurring  
75 species on tropical mountains [3,16].

76 A similar challenge exists when trying to discriminate ecological sorting and  
77 displacement. Both these models predict that species living on the same mountain slope  
78 should have non-overlapping elevation ranges, at least prior to any subsequent niche  
79 expansion. Thus, discriminating between these scenarios depends critically on inferences  
80 about whether elevational divergence precedes or is coincident with the attainment of  
81 secondary contact. Studies attempting to address this issue have variously used  
82 phylogenetic information to infer the relative timing of niche divergence and secondary  
83 sympatry or have compared elevation divergence between sister species in zones of  
84 sympatry to places where they remain allopatric [8,18]. However, while such tests can  
85 potentially detect evidence of whether a particular process operates or not, critically they do  
86 not reveal how frequently this process occurs and thus its relative contribution to the build-up  
87 of sympatric diversity [19]. Progress in understanding community assembly, thus requires  
88 new approaches that can reliably infer the relative frequencies of different historical  
89 processes underlying current patterns of species distributions.

90 Here, we investigate the relative frequency of ecological displacement, sorting, and  
91 niche conservatism and how they contribute to the co-occurrence of passerine birds across  
92 elevation gradients in the Neotropics. We first constructed a new dataset consisting of the  
93 divergence time, geographical and elevational distribution of  $n = 166$  sister species. We then  
94 apply a novel modelling approach that builds on previous studies examining the transition to

95 sympatry using continuous-time Markov models [10], but extend this framework by  
96 considering the multiple routes through which species can attain sympatry via the evolution  
97 of elevational ranges. Focussing on avian sister species, where we can confidently assume  
98 that speciation involves the geographic isolation of populations [12,20], allows us to use  
99 information on the current age and state (e.g. allopatric or sympatric, and overlapping in  
100 elevation or not) to model the historical pathways through which co-occurrence arises. Using  
101 this approach, we address three main objectives. First, what is relative importance of  
102 ecological sorting, displacement and niche conservatism in build-up of sympatry among  
103 Neotropical montane sister species? Second, what is the relative importance of ecological  
104 sorting and displacement in generating turnover between sister species across elevation  
105 gradients and how does co-occurrence at the same elevation arise? Third, can our  
106 framework accurately and precisely infer the rate at which species pairs pass through these  
107 different historical routes?

## 108 **2. Material and methods**

### 109 **(a) Elevational and geographic data**

110 We compiled a dataset consisting of avian sister species occurring in the tropical mountain  
111 ranges of the Neotropics. Sister species and their respective divergence times were  
112 extracted from two recently published phylogenies covering respectively >95% and >98% of  
113 the New World oscines and suboscines [21,22]. We only kept sister pairs that met the  
114 following conditions: (1) At least one of the species occupies montane habitat, defined as  
115 areas >500m above sea-level [3]. (2) Both species occupy predominantly humid  
116 environments such that species pairs could realistically live on the same mountain slope, e.g.  
117 we removed species pairs if one sister occupied predominantly arid habitat, assessed with  
118 information from field guides. (3) Both species live in the Neotropics, which included the  
119 tropical mountain ranges of Central-America. Species that had ranges stretching into North-  
120 America were included in the dataset if they were primarily Neotropical. The final dataset  
121 consisted of  $n = 166$  sister pairs. To establish that our results were robust and to verify  
122 previously published results, we also reanalysed a previously published global dataset of  
123 montane sister species (Supplementary material, Figure S2)[3].

124 We scored whether each sister pair was allopatric or sympatric and whether they had  
125 overlapping or non-overlapping elevational distribution. Geographical and elevational range  
126 data was gathered primarily from regional field guides [23–27] and supplemented by *Birds of*  
127 *the World (BW)* [28]. *BW* typically reflects information found in local field guides but  
128 incorporates more recent taxonomic changes. Sympatry was defined as when sister species  
129 were present on the same mountain slope, regardless of whether this overlap was

130 widespread (i.e. thousands of kms) or minimal (i.e. a few kms). In contrast, allopatry was  
131 defined as when sister species occurred exclusively on different mountain summits or  
132 regions, often separated by obvious geographical barriers (e.g. valleys).

133 We assigned species pairs to one of five possible discrete states, defined by the  
134 combination of sympatry/allopatry and elevation overlap/non-overlap. For sister species  
135 occurring in allopatry, they may have overlapping (state 1) or non-overlapping (state 3)  
136 elevational ranges. To ensure our results were not biased by marginal overlap along narrow  
137 contact zones, we used a threshold of elevation overlap of 20%, calculated as a proportion of  
138 the species with the narrower elevation range. To test the robustness of our conclusions,  
139 however, we also repeated our analysis using different values (1, 10, and 30% overlap,  
140 Figure S1).

141 Sister species occurring in sympatry may have non-overlapping elevational ranges  
142 (state 4), overlapping elevational ranges (state 5), or elevational ranges that overlap in  
143 allopatry but not sympatry (state 2). Assignment to state 2 can only be done if sister species  
144 occur partially in sympatry but at least one sister has a partially allopatric distribution, and no  
145 other closely related species forms a hypothesised elevational replacement in the allopatric  
146 part of their range. The latter condition was to ensure that any intraspecific variation was not  
147 caused by a tertiary species, as this would not be the result of interactions between the sister  
148 species. We assessed this with observations mentioned in field guides combined with any  
149 information on geographic and elevational ranges of congeners.

## 150 **(b) Statistical analysis using Markov models**

151 To infer the relative importance of different assembly scenarios in explaining the build-up of  
152 sympatry we developed a continuous time multi-state Markov model (Figure 1). In this model,  
153 the initial state for sister species is allopatry with overlapping elevational ranges (state 1),  
154 which reflects the situation expected at the time of their initial divergence [29]. Sister pairs  
155 then stochastically transition between states, with different transition pathways corresponding  
156 to the different assembly scenarios. Under the ecological sorting scenario, sister species first  
157 transition to having non-overlapping elevation ranges whilst remaining in allopatry (state 3).  
158 They can subsequently transition to having non-overlapping elevation ranges and occurring  
159 in sympatry (state 4). Under the ecological displacement scenario, sister species instead  
160 transition from state 1 to having non-overlapping elevation ranges in sympatry but  
161 maintaining overlapping elevation ranges in allopatry (state 2). Finally, the niche  
162 conservatism scenario is described by a direct transition from state 1 to sympatry and  
163 overlapping elevational ranges (state 5).

164           Once sympatry between sister species is attained (states 2, 4 or 5) we allow the  
165 further evolution of species elevational ranges. Sister pairs in state 2 (i.e. elevation overlap in  
166 allopatry and non-overlap in sympatry), can subsequently diverge in their elevation range in  
167 the allopatric part of their distribution (e.g. due to ecological opportunity) and thus transition  
168 to state 4. Alternatively, they can converge in their elevation range in their sympatric  
169 distribution (e.g. due to differentiation along an alternative niche axis reducing competition)  
170 and thus transition to state 5. Equally, we allow the possibility that sympatric sister species  
171 with non-overlapping elevation ranges (state 4) may subsequently converge to occur at the  
172 same elevation (state 5) [4,30]. Our model thus allows for the overlap (state 5) of sister pairs  
173 on the same mountain slope, which is considered to be the final state, to be attained through  
174 any of the three community assembly scenarios

175           Based on the estimated time since divergence and states of sister pairs at present we  
176 used maximum likelihood (ML) [31] to estimate the transition rates between the states. The  
177 full model contains 7 rate parameters corresponding to the 7 possible state transitions. We  
178 also considered simpler models by, for instance, constraining the transition rate from state 1  
179 to 2 to be equivalent to the transition rate from state 2 to 3. The simplest model has only a  
180 single rate parameter, corresponding to identical rates for all transitions. We compared  
181 model fit across all ( $n = 877$ ) combinations according to AIC and report both the best model  
182 and the model averaged parameter values of all highly supported models ( $\Delta AIC \leq 2$  of best  
183 model).

#### 184 **(c) Relative frequency of trajectories**

185 Having inferred the transition rates between states, we used these to estimate the relative  
186 contribution of ecological displacement (ED), ecological sorting (ES), and niche conservatism  
187 (NC) in the build-up of sympatry. Specifically, we used the inferred rates to perform 1000  
188 posterior predictive simulations using the Gillespie algorithm for constant rates [32]. Under  
189 the Gillespie algorithm, transitions between states correspond to events. The simulation  
190 starts at time  $t = 0$ , indicating the time since divergence for all sister species. The waiting  
191 time ( $\delta$ ) to the next event is determined by a random draw from an exponential distribution  
192 with the mean equal to the sum of all transition rates across all sister pairs, e.g. if the  
193 transition rate from state 1 to 2 ( $r_{12}$ ) is 0.05 and there are currently 5 pairs in state 1, then  
194 this transition adds 0.25 to the total rate. The event that occurs at time  $t + \delta$  is selected with a  
195 probability equal to the relative contribution of each rate to the total rate. This transition  
196 applies to a single species pair and this pair is chosen at random with equal weighting across  
197 all pairs that are currently in the relevant state. As we simulate forward in time, species can  
198 no longer transition if they are younger than  $t$ . The simulation is initiated with all sister pairs

199 being in state 1 and terminated once time  $t$  is greater than the age of the oldest sister pair.  
200 During the simulation we record the percentage of sister pairs passing through each of the  
201 three pathways corresponding to different community assembly scenarios (i.e. ED, ES, and  
202 NC), and report the mean and standard deviation across simulations runs.

#### 203 **(d) Assessing model fit**

204 Although the model is optimised using maximum likelihood, model fit may be poor if the  
205 underlying assumptions of the model are not met. If that is the case, estimated rates will  
206 poorly reflect the empirical observations. We assessed how well the predicted transition rates  
207 can predict the distribution of states among the sister pairs using the output of the posterior  
208 predictive simulations. To examine if there is bias in the effectiveness of our model  
209 depending on species age, we bin species pairs in three equal-width age bins: 0.07-3.80,  
210 3.80-7.52, and 7.52-11.25 million years (Myr), where 0.07 and 11.25 Myr are the age of the  
211 youngest and oldest pair. We used three bins to ensure we would approximately capture any  
212 changes in the trend in the prevalence of states through time beyond increases and  
213 decreases. The prevalence of each of the five states per age bin is then compared between  
214 the empirical data and 95% confidence intervals constructed from the final prevalence of the  
215 simulated states. If the empirical prevalence falls within the confidence intervals this would  
216 indicate good model fit (Figure 3), but large CI's would likewise indicate high uncertainty.

#### 217 **(e) Simulation tests of accuracy and precision**

218 Using simulations, we further evaluate the model by assessing if we can both accurately and  
219 precisely recover the transition rates. High accuracy indicates that the model is not biased  
220 towards over- or under-estimating particular transition rates. High precision indicates that the  
221 estimated rates are close to the true rates. We explored a number of different scenarios,  
222 designed to characterise the three different assembly models and variants of these (S1-S3),  
223 as well as a scenario assuming identical transition rates (S4) and one corresponding to the  
224 transition rates inferred from the empirical data (S5). For each scenario, we performed 100  
225 replicate simulations using the observed number and ages of sister pairs. For each  
226 simulation, we then performed an identical model fitting procedure as for our empirical data,  
227 reporting the parameter estimate for both the best model and the model averaged rates. We  
228 evaluate the accuracy and precision of the rate estimates using the median and 95%  
229 confidence intervals of the estimated rates.

### 230 **3. Results**

#### 231 **(a) Empirical distribution of sister pair states**

232 Across the  $n = 166$  sister species pairs, the majority are currently in allopatry with  
233 overlapping elevation ranges (state 1: 62%). The next most common state is sympatry with  
234 overlapping elevation ranges (state 5: 21%), with fewer pairs having non-overlapping  
235 elevational ranges and occurring in sympatry (state 4: 7%), or allopatry (state 3: 5%) or  
236 having non-overlapping elevational ranges in sympatry but overlapping elevational ranges in  
237 allopatry (state 2: 5%). The mean age of pairs that are in allopatry with overlapping elevation  
238 ranges (state 1: 2.31Myr) is younger than all other states (state 2: 3.46, state 3: 3.19, state 4:  
239 3.95, and state 5: 3.44Myr), consistent with our assumption that is the initial state at the time  
240 of species divergence.

#### 241 **(b) Transition rates between states**

242 We found that our best model contains three parameters and constrains  $r_{12}$ ,  $r_{13}$ ,  $r_{25}$ , and  
243  $r_{45}$  to 0.04 (CI95: 0.03-0.07),  $r_{15}$  to 0.10 (CI95: 0.07-0.14), and  $r_{24}$ ,  $r_{34}$  to 0.33 (CI95: 0.17-  
244 0.63). While there are 41 models that are highly supported ( $<2 \Delta AIC$ ), the model-averaged  
245 rate estimates are very similar to the best model. Because of this, we focus on the model-  
246 averaged results below. The model averaged results show that the transition rate from a  
247 state of allopatry with overlapping elevation ranges (state 1) to non-overlapping elevation  
248 ranges, either while in allopatry ( $r_{13} = 0.05/\text{Myr}$ ) or upon the attainment of sympatry ( $r_{12} =$   
249  $0.04/\text{Myr}$ ) is relatively slow. In contrast, the transition rate of allopatric pairs with overlapping  
250 elevation ranges (state 1) to sympatry with overlapping elevation ranges (state 5) is  
251 significantly faster ( $r_{15} = 0.10/\text{Myr}$ ).

#### 252 **(c) Accuracy and reliability of estimated transition rates**

253 Our simulations show that transition rates from state 1 ( $r_{12}$ ,  $r_{13}$ , and  $r_{15}$ ) (Figure 1), can be  
254 reliably and accurately estimated irrespective of the simulated scenario (Table 1). Later  
255 transitions ( $r_{24}$ ,  $r_{25}$ ,  $r_{34}$ ,  $r_{45}$ ) are estimated with less accuracy, probably because there are  
256 relatively few old sister pairs and thus less information to reliably estimate these rates.  
257 However, this does not affect the reliability of our conclusions because our aim is to infer the  
258 proportion of species pairs that embark on the different historical routes to sympatry and this  
259 depends on accurate estimation of the initial rates from state 1.

#### 260 **(d) The relative contribution of community assembly routes**

261 The posterior-predictive simulations show that following speciation a similar proportion of  
262 pairs embark on the ecological sorting (27.27%, CI95: 16.36-39.13%) and ecological  
263 displacement (20.63%, CI95: 11.11-30.44%) routes, whereby species diverge in elevation  
264 while in allopatry (i.e. from state 1 to state 3) or upon secondary contact (i.e. from state 1 to  
265 state 2) respectively (Figure 2b). Of the pairs with currently non-overlapping elevation ranges



266 in sympatry (states 2 and 4), more are inferred to be generated through ecological  
267 displacement (58.82%, CI95: 35.00-80.02%) than sorting (41.18%, CI95: 19.98-65.00%)  
268 (Figure 2c). However, confidence intervals on the proportion of pairs estimated to undergo  
269 ecological displacement and sorting broadly overlap, suggesting there is little evidence that  
270 one route is more common than the other.

271         Following speciation, the majority of pairs follow the niche conservatism route  
272 (51.67%, CI95: 39.39-64.52%), transitioning directly to sympatry without diverging in their  
273 elevation range (i.e. from state 1 to state 5) (Figure 2b). Of the species pairs that attain  
274 overlapping elevation ranges in sympatry (state 5) almost all of these (93.94%, CI95: 83.87-  
275 100.0%) originate through the niche conservatism route (Figure 2d). This can be explained  
276 because of the low transition rates in the early stages of the ecological sorting (r13) and  
277 displacement (r12) routes and because species pairs taking these route must pass through a  
278 number of intermediate states to attain overlapping elevation ranges in sympatry. We note  
279 that relaxing our threshold at which we consider species to have overlapping elevation  
280 ranges resulted in qualitatively similar results (Figure S1).

#### 281 **(d) Assessing model fit**

282 The posterior-predictive simulations under the estimated parameter values predict the  
283 incidence of the five states well (Figure 3). The simulations capture the main patterns,  
284 namely: an increase with age of sympatric pairs that have not diverged in elevation (state 5),  
285 a decrease in the pairs that have not diverged in elevation and are allopatric (state 1), and  
286 slight increases for pairs that are either in allopatry or sympatry but have diverged in  
287 elevation (state 2, 3 and 4). However, the simulations also show that our model has large  
288 confidence intervals. This is likely caused by the uneven age distribution of species pairs in  
289 our empirical dataset. While there are 131 pairs <3.80 Myr and 33 pairs 3.80-7.52 Myr, only 2  
290 sister pairs exceed 7.52Myr.

#### 291 **4. Discussion**

292 Multiple historical processes have been proposed to explain the combination and diversity of  
293 species within ecological communities. However, because previous studies have focused on  
294 static biogeographic patterns and treated ecological sorting, displacement and niche  
295 conservatism as alternative explanations, their relative contribution to community assembly  
296 has remained unknown. Through our analysis of the dynamics of sympatry and elevation  
297 overlap among Neotropical montane birds, we present three key findings. First, we show that  
298 the relative contributions of different historical assembly models can be reliably inferred given  
299 current phylogenetic and geographic data among sister species. Second, our results show  
300 that ecological sorting and displacement contribute almost equally to explaining the turnover

301 of closely related bird species across elevation gradients in the Neotropics. Finally, we show  
302 that the build-up of sympatry (i.e. living on the same mountain slope) and the overlap of  
303 sister species along elevation gradients is almost entirely (>90%) explained by conservatism  
304 of species elevation niches, rejecting more complex scenarios requiring niche displacement  
305 followed by subsequent expansion.

306         The high diversity of tropical mountains is associated with a rapid turnover of species  
307 as ecologically similar species replace one another up the mountain. Previous studies of  
308 montane birds have concluded that ecological displacement rather than sorting is the  
309 dominant process explaining such elevational replacements [3,16]. This is because most  
310 sister pairs with divergent elevation ranges currently occur in sympatry rather than allopatry,  
311 potentially consistent with the idea that divergence happens upon secondary contact rather  
312 than during geographic isolation. However, our results suggest that the importance of  
313 ecological sorting has been underestimated. This is because species that diverged in their  
314 elevation ranges while in allopatry can subsequently transition to sympatry, thus reducing the  
315 apparent incidence of allopatric pairs with divergent elevational ranges. Our phylogenetic  
316 model accounts for these historical dynamics and shows that ecological sorting and  
317 displacement contribute approximately equally to explaining turnover among sister species  
318 across tropical elevation gradients.

319         While our analysis detects evidence of both ecological sorting and displacement, we  
320 find that niche conservatism is a much more frequent route to sympatry, accounted for ~68%  
321 of sister species living on the same mountain slope. Such a high frequency of niche  
322 conservatism may not seem surprising, given that previous studies focussed on the drivers of  
323 speciation have shown that most vertebrate sister species have overlapping elevation ranges  
324 [9]. However, a high frequency of elevation overlap among sister species is by itself  
325 inconclusive regarding the mode of community assembly because the same pattern can  
326 arise under the ecological displacement model if the initial constraints on elevational overlap  
327 weaken as species diverge across alternative niche axis (e.g. resource use). Our  
328 phylogenetic approach to modelling the dynamics of elevation range overlap, enables us to  
329 exclude this possibility. Indeed, we estimate that displacement and subsequent overlap in  
330 species elevational ranges contributes little (3.57%) to current patterns of co-occurrence  
331 along elevation slopes.

332         Our finding that niche conservatism is more common than ecological sorting or  
333 displacement does not suggest that competition or other negative species interactions are  
334 unimportant in the assembly of montane bird communities. Indeed, evidence that  
335 interspecific competition limits elevational ranges is widespread in birds [33–35]. Instead, we

336 suggest that species attaining sympatry without diverging in their elevation range are likely to  
337 have diverged across alternative niche dimensions such as resource or microhabitat use.  
338 Such an explanation would be consistent with previous evidence that coexistence of  
339 Neotropical bird species following speciation is limited by rates of divergence in key trophic  
340 traits, such as beak size [10]. Given the relatively young age of many Neotropical montane  
341 radiations and that there is little evidence for a slowdown in the rates of diversification, it is  
342 possible that local niche space at any point along the elevational gradient remains far from  
343 saturated [36]. As alternative niche dimensions become increasingly densely packed, it is  
344 possible that ecological sorting and displacement may become increasingly important routes  
345 to sympatry as has been suggested for New Guinean songbirds [16].

346 It could be argued that the relatively low frequency of ecological sorting and  
347 displacement inferred by our models is a peculiarity of Neotropical birds and that the  
348 dynamics of community assembly in this region may differ from other tropical mountain  
349 systems that have different geographic configurations and histories of uplift. However, we  
350 note that we obtained very similar results when re-analysing a global dataset of avian sister  
351 species (albeit skewed towards the Neotropics)(Fig. S2), suggesting that our conclusions  
352 may apply across tropical mountain regions generally. Another possible critique of our  
353 approach, is that by focussing on sister species we have not detected ecological  
354 displacement or sorting occurring among more distantly related species. Indeed, species  
355 that form elevational replacements along mountain slopes are often not sisters [37–39].  
356 However, this is also unlikely to explain our results because it is among young, ecologically  
357 similar species that competition and other negative species interactions are expected to be  
358 strongest.

359 The expansion of species ranges following speciation is an essential step not only in  
360 the build-up of sympatry but also in providing renewed opportunities for further rounds of  
361 geographic isolation and thus the generation of new species. Our results show that the rate  
362 of range expansions leading to sympatry are substantially accelerated by the capacity for  
363 species to occur on the same slope without having to first diverge in their elevation niche.  
364 Specifically, according to our models, the expected lag time to sympatry under the niche  
365 conservatism route (10.26Myr), is substantially shorter than the lag time for species passing  
366 through the ecological sorting or displacement routes combined (29.39Myr). Thus, in addition  
367 to the turnover of species across elevations, a key additional ingredient explaining the high  
368 diversity of tropical mountains is the capacity for species to coexist locally at the same  
369 elevation.

370 Our model represents a simplification of the complex processes governing the  
371 assembly of montane biotas and is limited to explaining the patterns of sympatry and  
372 elevation overlap among sister species. However, to our knowledge this is the first study to  
373 quantify the relative frequency of ecological sorting, ecological displacement, and niche  
374 conservatism in shaping species elevational ranges. A key next step will be to test how these  
375 dynamics may vary across different mountain regions or taxa that vary in their ecology. Such  
376 a comparative approach may be necessary to uncover why ecological sorting and  
377 displacement appear to be relatively rare between the species where we expect them to be  
378 most common. Our model could also be applied to disentangle the dynamics of assembly  
379 across other ecological gradients and evolutionary radiations, such as the vertical layering of  
380 foraging niches among rainforest birds [40], perch height among Anolis lizards [41] or depth  
381 zonation in the Cichlid fish of East African rift lakes [42].

## 382 **Acknowledgements**

## 383 **Funding statement**

384 This research was supported by a Royal Society University Research Fellowship awarded to  
385 ALP and studentship to BRR.

## 386 **CRedit**

387 BRR – Conceptualisation; Data curation; Formal analysis; Investigation; Methodology;  
388 Visualisation; Writing – original draft. BGF – Data curation; Resources; Writing – review &  
389 editing. DJM – Conceptualisation; Methodology; Supervision; Writing – review & editing. ALP  
390 – Conceptualisation; Funding acquisition; Methodology; Supervision; Writing – review &  
391 editing.

## 392 **References**

- 393 1. Mittelbach GG, Schemske DW. 2015 Ecological and evolutionary perspectives on  
394 community assembly. *Trends Ecol. Evol.* **30**, 241–247.  
395 (doi:10.1016/j.tree.2015.02.008)
- 396 2. Weber MG, Wagner CE, Best RJ, Harmon LJ, Matthews B. 2017 Evolution in a  
397 Community Context: On Integrating Ecological Interactions and Macroevolution.  
398 *Trends Ecol. Evol.* **32**, 291–304. (doi:10.1016/j.tree.2017.01.003)
- 399 3. Freeman BG. 2015 Competitive Interactions upon Secondary Contact Drive  
400 Elevational Divergence in Tropical Birds. *Am. Nat.* **186**, 470–479.  
401 (doi:10.1086/682703)
- 402 4. Wiens JJ *et al.* 2010 Niche conservatism as an emerging principle in ecology and

- 403 conservation biology. *Ecol. Lett.* **13**, 1310–1324. (doi:10.1111/j.1461-  
404 0248.2010.01515.x)
- 405 5. Cadena CD. 2007 Testing the role of interspecific competition in the evolutionary  
406 origin of elevational zonation: An example with buarremon brush-finches (aves,  
407 emberizidae) in the neotropical mountains. *Evolution (N. Y.)*. **61**, 1120–1136.  
408 (doi:10.1111/j.1558-5646.2007.00095.x)
- 409 6. Pfennig DW, Pfennig KS. 2010 Character displacement and the origins of diversity.  
410 *Am. Nat.* **176**. (doi:10.1086/657056)
- 411 7. Stuart YE, Losos JB. 2013 Ecological character displacement: Glass half full or half  
412 empty? *Trends Ecol. Evol.* **28**, 402–408. (doi:10.1016/j.tree.2013.02.014)
- 413 8. Brown WL, Wilson EO. 1956 Character displacement. *Syst. Zool.* **5**, 49–64.  
414 (doi:10.2307/2411924)
- 415 9. Cadena CD *et al.* 2011 Latitude, elevational climatic zonation and speciation in New  
416 World vertebrates. *Proc. R. Soc. B Biol. Sci.* **279**, 194–201.  
417 (doi:10.1098/rspb.2011.0720)
- 418 10. Pigot AL, Jetz W, Sheard C, Tobias JA. 2018 The macroecological dynamics of  
419 species coexistence in birds. *Nat. Ecol. Evol.* **2**, 1112–1119. (doi:10.1038/s41559-018-  
420 0572-9)
- 421 11. Walker B, Stotz DF, Pequeno T, Fitzpatrick JW. 2006 Birds of the Manu Biosphere  
422 Reserve. *Fieldiana Zool.* **110**, 23–49. (doi:10.3158/0015-  
423 0754(2006)110[23:botmbr]2.0.co;2)
- 424 12. Price T. 2008 *Speciation in birds*. Greenwood village, Colorado: Roberts and Co.
- 425 13. Cadena CD, Céspedes LN. 2019 Origin of elevational replacements in a clade of  
426 nearly flightless birds – most diversity in tropical mountains accumulates via  
427 secondary contact following allopatric speciation. *bioRxiv* , 635–659.  
428 (doi:10.1101/606558)
- 429 14. Linck E, Freeman BG, Dumbacher JP. 2020 Speciation and gene flow across an  
430 elevational gradient in New Guinea kingfishers. *J. Evol. Biol.* **33**, 1643–1652.  
431 (doi:10.1111/jeb.13698)
- 432 15. Terborgh J, Weske JS. 1975 The role of competition in the distribution of Andean  
433 birds. *Ecology* **56**, 1237-562–576. (doi:10.2307/1939177)
- 434 16. Diamond JM. 1973 Distributional ecology of New Guinea Birds. *Science (80- )*. **179**,

- 435 759–769. (doi:10.1126/science.179.4075.759)
- 436 17. Linck EB, Freeman BG, Cadena CD, Ghalambor CK. 2021 Evolutionary conservatism  
437 will limit responses to climate change in the tropics. *Biol. Lett.* **17**.  
438 (doi:10.1098/rsbl.2021.0363)
- 439 18. Lack D. 1947 *Darwin's finches*. Cambridge University Press Cambridge.
- 440 19. Anderson SAS, Weir JT. 2021 Character displacement drives trait divergence in a  
441 continental fauna. *Proc. Natl. Acad. Sci. U. S. A.* **118**. (doi:10.1073/pnas.2021209118)
- 442 20. Phillimore, Orme, Thomas, Blackburn, Bennett, Gaston, Owens. 2008 Sympatric  
443 Speciation in Birds Is Rare: Insights from Range Data and Simulations. *Am. Nat.* **171**,  
444 646. (doi:10.2307/30119664)
- 445 21. Barker K, Burns KJ, Klicka J, Lanyon SM, Lovette IJ. 2015 New insights into New  
446 World biogeography: An integrated view from the phylogeny of blackbirds, cardinals,  
447 sparrows, tanagers, warblers, and allies. *Auk* **132**, 333–348. (doi:10.1642/AUK-14-  
448 110.1)
- 449 22. Harvey MG *et al.* 2020 The evolution of a tropical biodiversity hotspot. *Science (80- )*.  
450 **370**, 1343–1348. (doi:10.1126/science.aaz6970)
- 451 23. Athanas N, Greenfield PJ. 2016 *Birds of western Ecuador: A photographic guide*.  
452 Princeton University Press.
- 453 24. Hilty SL. 2003 *Birds of venezuela*. 2nd edn. Princeton University Press.
- 454 25. Schulenberg TS, Stotz DF, Lane DF, O'Neill JP, Parker TA. 2007 *Birds of peru*.  
455 Princeton University Press.
- 456 26. Valley AC, Dyer D. 2018 *Birds of Central America*. Princeton University Press.
- 457 27. Stotz DF, Fitzpatrick JW, Parker III TA, Moskovits DK. 1996 *Neotropical birds: ecology*  
458 *and conservation*. University of Chicago Press.
- 459 28. Billerman SM, Keeney BK, Rodewald PG, Schulenberg TS, editors. 2020 *Birds of the*  
460 *World*. Ithaca, NY, USA: Cornell Laboratory of Ornithology.
- 461 29. Coyne JA, Orr HA. 2004 *Speciation*. Sunderland, MA: Sinauer Associates, Inc.
- 462 30. Tobias JA, Cornwallis CK, Derryberry EP, Claramunt S, Brumfield RT, Seddon N.  
463 2014 Species coexistence and the dynamics of phenotypic evolution in adaptive  
464 radiation. *Nature* **506**, 359–363. (doi:10.1038/nature12874)

- 465 31. Jackson CH. 2011 Multi-state models for panel data: The msm package for R. *J. Stat.*  
466 *Softw.* **38**, 1–28. (doi:10.18637/jss.v038.i08)
- 467 32. Gillespie DT. 1977 Exact stochastic simulation of coupled chemical reactions. *J. Phys.*  
468 *Chem.* **81**, 2340–2361. (doi:10.1021/j100540a008)
- 469 33. Freeman BG, Class Freeman AM, Hochachka WM. 2016 Asymmetric interspecific  
470 aggression in New Guinean songbirds that replace one another along an elevational  
471 gradient. *Ibis (Lond. 1859)*. **158**, 726–737. (doi:10.1111/ibi.12384)
- 472 34. Freeman BG, Tobias JA, Schluter D. 2019 Behavior influences range limits and  
473 patterns of coexistence across an elevational gradient in tropical birds. *Ecography*  
474 *(Cop.)*. , 1–9. (doi:10.1111/ecog.04606)
- 475 35. Freeman BG, Montgomery G. 2016 Interspecific aggression by the Swainson's  
476 Thrush ( *Catharus ustulatus* ) may limit the distribution of the threatened Bicknell's  
477 Thrush ( *Catharus bicknelli* ) in the Adirondack Mountains . *Condor* **118**, 169–178.  
478 (doi:10.1650/condor-15-145.1)
- 479 36. Weir JT. 2006 Divergent Timing and Patterns of Species Accumulation in Lowland and  
480 Highland Neotropical Birds. *Evolution (N. Y)*. **60**, 842. (doi:10.1554/05-272.1)
- 481 37. Caro LM, Caycedo-Rosales PC, Bowie RCK, Slabbekoorn H, Cadena CD. 2013  
482 Ecological speciation along an elevational gradient in a tropical passerine bird? *J.*  
483 *Evol. Biol.* **26**, 357–374. (doi:10.1111/jeb.12055)
- 484 38. García-Moreno J, Fjeldså J. 1999 Chronology and mode of speciation in the Andean  
485 avifauna. *Isol. Vertebr. Communities Trop. Proc. 4th Int. Symp.* , 25–46.
- 486 39. Patton JL, Smith MF. 1992 mtDNA phylogeny of Andean mice: a test of diversification  
487 across ecological gradients. *Evolution (N. Y)*. **46**, 174–183. (doi:10.1111/j.1558-  
488 5646.1992.tb01992.x)
- 489 40. MacArthur RH. 1958 Population Ecology of Some Warblers of Northeastern  
490 Coniferous Forests. *Ecology* **39**, 599–619. (doi:10.2307/1931600)
- 491 41. Lister BC. 1976 The Nature of Niche Expansion in West Indian Anolis Lizards I:  
492 Ecological Consequences of Reduced Competition. *Evolution (N. Y)*. **30**, 659–676.
- 493 42. Rodríguez MA, Lewis WM. 1997 Structure of fish assemblages along environmental  
494 gradients in floodplain lakes of the Orinoco River. *Ecol. Monogr.* **67**, 109–128.  
495 (doi:10.1890/0012-9615(1997)067[0109:SOFAAE]2.0.CO;2)

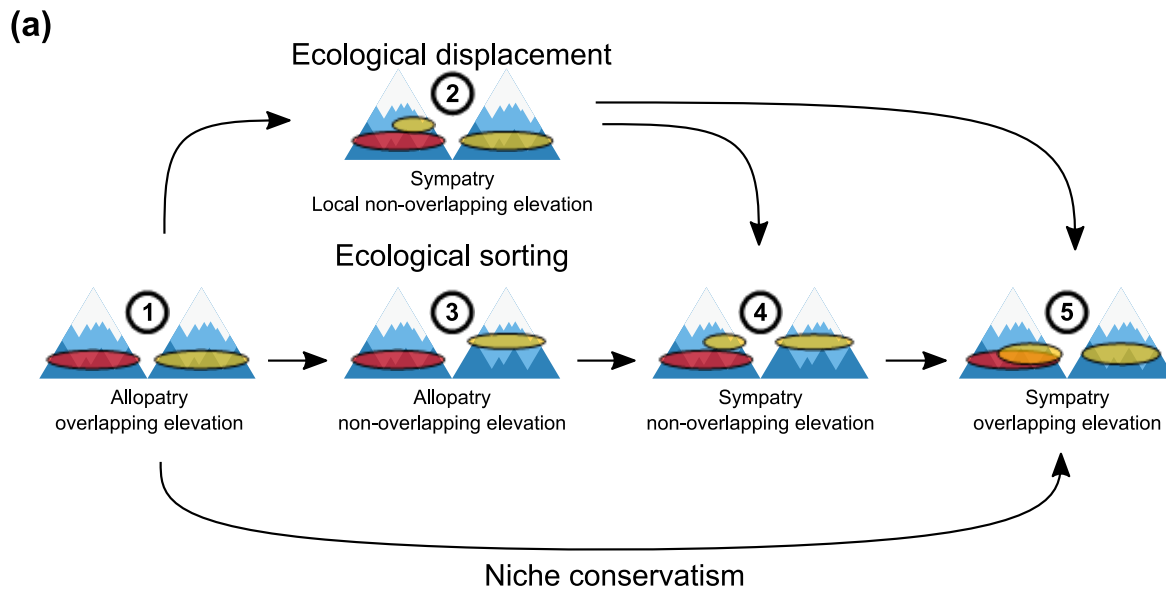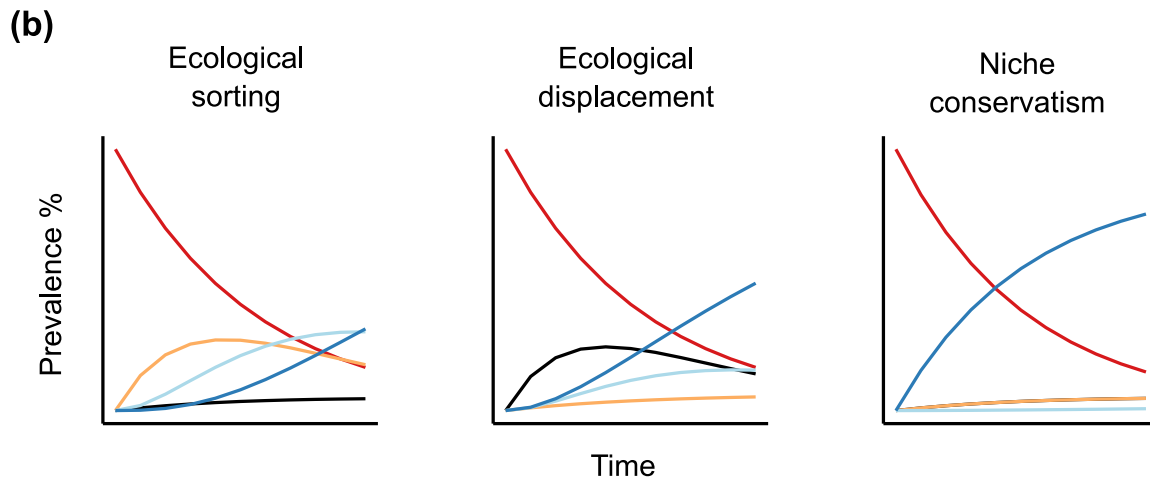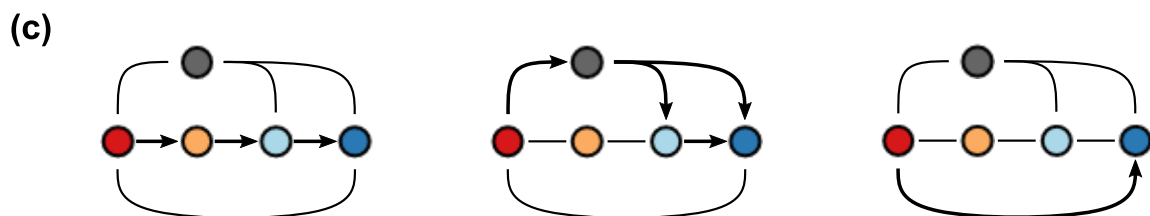

496

497 **Figure 1** Hypothetical trajectories towards sympatry in montane sister species. a) All  
 498 possible transitions in our models with their respective geographical and elevational context.  
 499 (1) Species originate in allopatry and initially share the same elevational range.  
 500 Subsequently, pairs might either stay in allopatry, but diverge in elevational range (3), attain  
 501 partial elevational differentiation only in sympatry but retain overlap in allopatry (2), transition  
 502 to sympatry but with differentiated elevational ranges (4), or transition to sympatry and co-  
 503 occurrence (5). b) The prevalence of the five states through time according to the three  
 504 hypothesised trajectories: I) Ecological sorting (ES), II) Ecological displacement (ED) and III)  
 505 Niche conservatism (NC). These hypotheses are based on simulations in which the



506 respective pathways are dominant highlight the differences in temporal dynamics. c) An  
507 abstract view of the dominant transitions under respectively ES, ED, and NC.

508

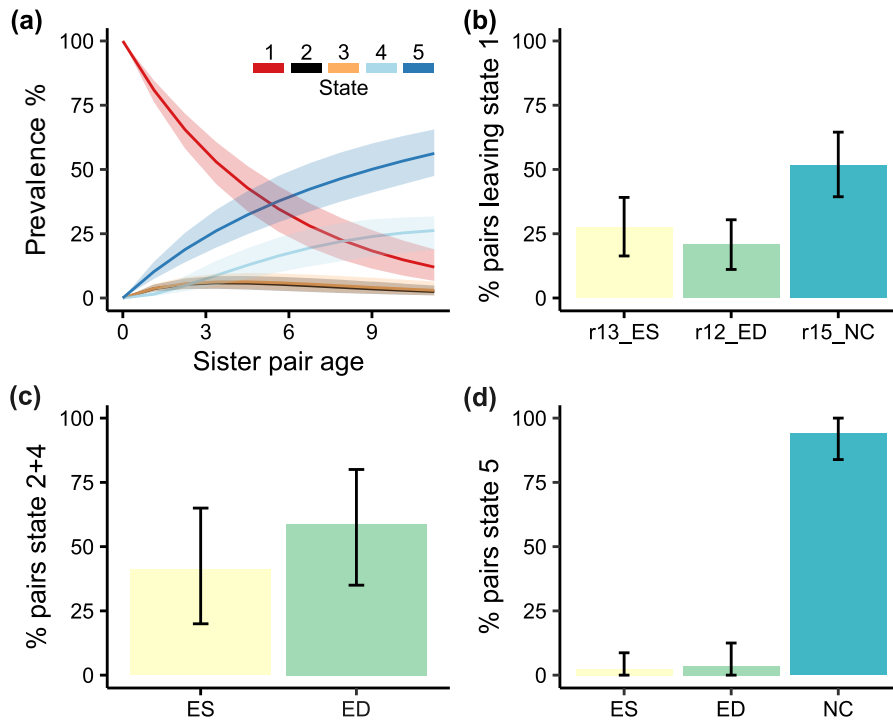

509

510

511 **Figure 2** Sister species occurrence predictions through time and trajectories taken. a)  
512 predicted prevalence of the five states, as represented in Figure 1a, through time. State 2  
513 and 3 overlap greatly in predicted prevalence. Shaded areas show 95% confidence intervals.  
514 b) Percentage of sister pairs that leave state 1 and start on each of the three routes towards  
515 sympatry. c) the percentage of pairs gone through either ecological sorting (ES) or ecological  
516 displacement (ED) that occupy non-overlapping elevational ranges in sympatry. d) The  
517 percentage of pairs that have gone through ES, ED, or niche conservatism (NC) to reach  
518 sympatric ranges with overlapping elevational distributions. Results are obtained from  
519 posterior-predictive simulations of the model-averaged parameter estimates.

520

521

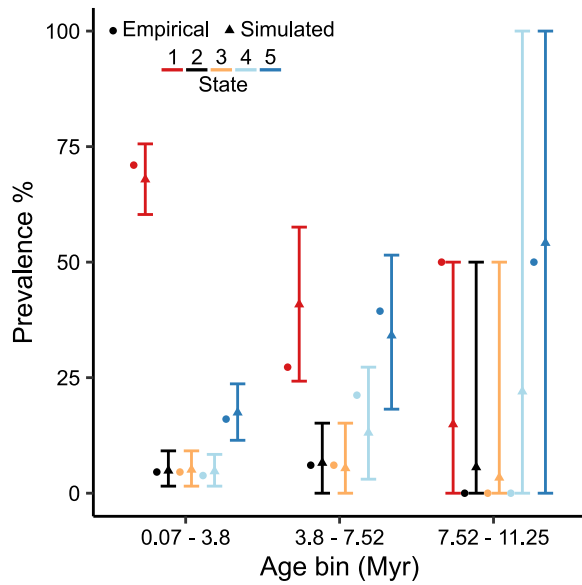

522

523 **Figure 3** empirical prevalence and predicted prevalence of states by age category. Predicted  
524 prevalence (triangles) was obtained from posterior predictive simulations, and empirical data  
525 (circles) represents the prevalence of the states within three bins of equal age width starting  
526 at the youngest pair and ending at the oldest. Data among age groups is distributed unevenly  
527 ( $n = 131, 33, \text{ and } 2$ ). Brackets indicate the 95% confidence interval of the prevalence of the  
528 states across 1000 simulations.
